# Supplementary material
Source: Elsevier journal article supplement (https://www.sciencedirect.com/science/article/pii/S260507302100002X)
Supplement: mmc1 [file S260507302100002X:mmc1.doc]

There is no supplementary material.
